# Supplementary material for: Fragment-based discovery of a chemical probe for the PWWP1 domain of NSD3
Source: Springer Nature journal article supplement (doi:10.1038/s41589-019-0310-x), 2019-07-08
Supplement: 41589_2019_310_MOESM15_ESM.mol [file 41589_2019_310_MOESM15_ESM.mol]

nchembio.A180307457C-comp8.mol
  ChemDraw05091910492D

 18 20  0  0  0  0  0  0  0  0999 V2000
    1.1671   -1.2445    0.0000 N   0  0  0  0  0  0  0  0  0  0  0  0
    1.8311   -0.7734    0.0000 C   0  0  0  0  0  0  0  0  0  0  0  0
    1.5941    0.0101    0.0000 N   0  0  0  0  0  0  0  0  0  0  0  0
    0.7726    0.0101    0.0000 C   0  0  0  0  0  0  0  0  0  0  0  0
    0.5097   -0.7734    0.0000 C   0  0  0  0  0  0  0  0  0  0  0  0
    0.2854    0.6781    0.0000 C   0  0  0  0  0  0  0  0  0  0  0  0
   -0.2745   -1.0352    0.0000 C   0  0  0  0  0  0  0  0  0  0  0  0
    0.6264    1.4170    0.0000 C   0  0  0  0  0  0  0  0  0  0  0  0
    0.1274    2.0969    0.0000 C   0  0  0  0  0  0  0  0  0  0  0  0
   -0.6886    2.0094    0.0000 C   0  0  0  0  0  0  0  0  0  0  0  0
   -1.0083    1.2652    0.0000 C   0  0  0  0  0  0  0  0  0  0  0  0
   -0.5321    0.5903    0.0000 C   0  0  0  0  0  0  0  0  0  0  0  0
    1.1613   -2.0688    0.0000 C   0  0  0  0  0  0  0  0  0  0  0  0
   -0.8802   -0.4748    0.0000 C   0  0  0  0  0  0  0  0  0  0  0  0
   -1.6635   -0.7354    0.0000 C   0  0  0  0  0  0  0  0  0  0  0  0
   -1.8311   -1.5438    0.0000 N   0  0  0  0  0  0  0  0  0  0  0  0
   -1.2189   -2.0969    0.0000 C   0  0  0  0  0  0  0  0  0  0  0  0
   -0.4329   -1.8319    0.0000 C   0  0  0  0  0  0  0  0  0  0  0  0
  1  2  1  0      
  1  5  1  0      
  1 13  1  0      
  2  3  2  0      
  3  4  1  0      
  4  5  2  0      
  4  6  1  0      
  5  7  1  0      
  6  8  2  0      
  6 12  1  0      
  7 14  2  0      
  7 18  1  0      
  8  9  1  0      
  9 10  2  0      
 10 11  1  0      
 11 12  2  0      
 14 15  1  0      
 15 16  2  0      
 16 17  1  0      
 17 18  2  0      
M  END
